# Supplementary material for: Increasing targeting scope of adenosine base editors in mouse and rat embryos through fusion of TadA deaminase with Cas9 variants
Source: PubMed Central journal article supplement (PMC6107483; doi:10.1007/s13238-018-0568-x), 2018-07-31
Supplement: 13238_2018_568_MOESM1_ESM.pdf [file 13238_2018_568_MOESM1_ESM.pdf]

## Materials and Methods

### Construction of ABE7.10, SaKKH-ABE , VQR-ABE and sgRNA expression vectors.

Human Codon-optimized TadA-linker-TadA\* sequences were codon optimized and synthesized by Idobio (Nanjing, China). PCR was performed using KOD –Plus- Neo DNA Polymerase (TOYOBO, Code:KOD-401). Fragments TadA-linker-TadA\* , Cas9n(D10A) (template: Addgene Plasmid #42335), SaKKH (template: Addgene Plasmid #85170) , VQR-Cas9 (template: Addgene plasmid #101715, the clone primer was the same as Cas9n(D10A)) were amplified with primers listed in table S3. Fragments TadA-linker-TadA\* and corresponding fragment Cas9n(D10A) , SaKKH , VQR-Cas9 were assembled into the pCMV-BE3 (Addgene plasmid # 73021) (digested with NotI and PmeI ) using ClonExpress MultiS One Step Cloning Kit (Vazyme) to generate plasmid ABE7.10, SaKKH-ABE, VQR-ABE, respectively (Supplementary sequence 1-3). U6-sgRNA scaffold for SpCas9 or SaCas9 were amplified from PX458 or BPK2660 (Addgene Plasmid #70709) respectively, and cloned into pcDNA 3.1(+)-eGFP (Addgene Plasmid #78583) to generate U6-sgRNA(sp)-EF1 $\alpha$ -GFP or U6-sgRNA(sa)-EF1 $\alpha$ -GFP. T7-sgRNA scaffold for SpCas9 or SaCas9 were amplified from PX458 (Addgene Plasmid #48138) or BPK2660 (Addgene Plasmid #70709), and cloned into pcDNA 3.1(+)-eGFP (Addgene Plasmid #78583) to generate T7-sgRNA sp-scaffold or T7-sgRNA sa-scaffold, respectively.

### Preparation of sgRNA and mRNA

The annealed sgRNAs were cloned into the T7-sgRNA sp-scaffold or T7-sgRNA sa-scaffold. The T7 promoter and different sgRNA templates were amplified using primers IVT-PCF-F/R ( sp ) and IVT-PCF-F/R ( sa ) (table S5). The sgRNAs were then transcribed using the in vitro Transcription T7 Kit (MEGAscript™ Kit, Ambion). The T7 promoter was introduced to ABE7.10 or SaKKH-ABE or VQR-ABE mRNA template by PCR using primers IVT-T7-ABE7.10-F/R or IVT-T7-saKKH-ABE7.10-F/R (table S5). ABE7.10, SaKKH-ABE and VQR-ABE mRNAs were transcribed using

the in vitro RNA transcription kit (mMESSAGE mMACHINE® T7 Ultra Kit, Ambion). Both sgRNA and mRNA were purified with MEGAclean™ Kit (Ambion). Chemically modified cr-RNA and trac-RNA were synthesized by Genscript (Nan jing, China) (Supplementary sequence 4).

### **Cell culture and transfection.**

HEK293T (ATCC CRL-3216) cells lines were maintained in Dulbecco's Modified Eagle's medium (DMEM) supplemented with 10% FBS (Gibico), 100 U ml<sup>-1</sup> penicillin, and 100 mg ml<sup>-1</sup> streptomycin at 37 °C with 5% CO<sub>2</sub> incubation. Cells were seeded into 24-well plates (Corning) one day before transfection at a density of 200,000 cells per well, and transfected at 70–80% confluency using polyethylenimine (Polysciences) following the manufacturer's recommended protocol. For each well of a 24-well plate, a total of 500 ng DNA was used. 250 ng of SaKKH-ABE and 250 ng of sgRNA expression plasmids were transfected using 1.5 µl of polyethylenimine per well according to the manufacturer's protocol. The cells in a 24-well plate were seeded into a 12-well plate 3 days after transfection. Fluorescence-activated cell sorting (FACS) was performed 5 days after transfection following BD's recommended protocol.

### **Microinjection of zygotes.**

For microinjection, solutions containing complexes of ABE7.10 (50 ng/µl), SaKKH-ABE (50 ng/µl) or VQR-ABE mRNA ( 50ng/µl ) and sgRNA (50 or 100 ng/µl) were diluted in Nuclease-free Water and injected into cytoplasm using an Eppendorf transferMan NK2 micromanipulator. Injected zygotes were transferred into pseudopregnant female mice or rats immediately after injection or after overnight culture in KSOM medium at 37 °C in a humidified atmosphere consisting of 5% CO<sub>2</sub> in air.

### **Animals.**

C57/BL6 strain mice and Sprague-Dawley strain rats purchased from Shanghai Laboratory Animal Center were housed in standard cages in a specific pathogen-free facility on a 12 h light/dark cycle with ad libitum access to food and water. All animal

experiments conformed to the regulations drafted by the Association for Assessment and Accreditation of Laboratory Animal Care in Shanghai and were approved by the East China Normal University Center for Animal Research. To obtain homozygous mice carrying mutation on the TGA stop codon of *Fah*, the crossed founders were kept on 10 mg/L NTBC water.

#### **Targeted deep sequencing of genomic DNA samples**

HEK293T or mouse tail tip genomic DNA was isolated using the blood/cell/tissue DNA Isolation Kit (TianGen) according to the manufacturer's instructions. PCR products for targeted deep sequencing were prepared as described in HI-TOM Kits (Novogene). Mixed samples were sequenced on the Illumina HiSeq platform as previously described ([www.hi-tom.net/hi-tom/documentation.html](http://www.hi-tom.net/hi-tom/documentation.html)). All primers used for Hi-Tom deep sequencing are listed in table S6.

#### **qPCR**

Mice were sacrificed by carbon dioxide asphyxiation. Total RNA was extracted from mouse liver using RNAiso Plus (Takara) and reverse transcribed using HiScript II Q RT SuperMix (Vazyme). qPCRs were run on QuantStudio 3 (Applied Biosystems) using Hieff™ qPCR SYBR® Green Master Mix (YEASEN). Data were normalized to  $\beta$ -Actin. Primers used for qPCR are listed in table S4.

#### **Western blot, histology and immunohistochemistry.**

For western blot, mouse liver protein lysates were prepared in RIPA buffer with proteinase and phosphatase inhibitors. Proteins were separated on SDS/PAGE and transferred to nitrocellulose membranes for immunostaining with 1:500 anti-Fah antibody (AbboMax). For immunohistochemistry, mouse livers were fixed with 4% paraformaldehyde (PFA), embedded in paraffin, sectioned at 5  $\mu$ m and detected with 1:2000 anti-Fah antibody (AbboMax). For measuring glycogen content, rat muscles tissues were fixed with 4% PFA, frozen in Tissue Freezing Medium (Leica), sectioned at 5  $\mu$ m and stained using Glycogen Periodic Acid Schiff (PAS/Hematoxylin) Stain Kit (Solarbio).

#### **Serum biochemical analysis.**

Blood was collected using retro-orbital puncture and centrifuged at 12,000 r.p.m. at 4 for 5 min. The serum was frozen at  $-80^{\circ}\text{C}$  before being sent to ADICON Clinical Laboratory to determine AST, ALT, TBIL and ALB levels.

#### **GAA activity assay**

Substrate was 6 mM 4-methylumbelliferone- $\alpha$ -glucopyranoside (Sigma), prepared in 10% 2-methoxyethanol/0.2M phosphate citrate (PC) buffer (0.1M citric acid, 0.2 M  $\text{Na}_2\text{HPO}_4$  in DI water, pH 4.3). Protein concentrations were determined by BCA Protein Assay Kit (Pierce). The acid  $\alpha$ -glucosidase assay reaction mixture in each tube consisted of 50 $\mu\text{L}$  muscle tissue homogenates, 10 $\mu\text{L}$  100 $\mu\text{M}$  acarbose, and 50 $\mu\text{L}$  6mM 4-MUG. Two blank tubes with 50 $\mu\text{L}$  water instead of homogenates were incubated along with the samples. All tubes were incubated for 1 hour at  $37^{\circ}\text{C}$ . The reaction was stopped by addition of 1.25 mL of Glycine Carbonate buffer (glycine, 0.17 M;  $\text{Na}_2\text{CO}_3$ , 0.51M; pH 10.3). Muscle tissue homogenate (50 $\mu\text{L}$ ) was added to each blank tube after the reaction was stopped. Fluorescence intensity was measured with a VICTOR2 spectrofluorometer (Finland, Wallac). Acid  $\beta$ -galactosidase at pH4.0 was used as a control. Enzyme activity is expressed as nmol/hour/mg protein.

#### **Statistics**

Data are presented as means  $\pm$  DS. Means of two groups were compared using Student's t-test (unpaired, 2-tailed), with  $P < 0.05$  considered to be statistically significant.

#### **Data availability.**

Plasmids encoding ABE7.10 and SaKKH-ABE are available upon request from Addgene. See Supplementary Sequences 3 for full amino acid sequences. High-throughput sequencing data have been deposited in the NCBI Sequence Read Archive database under accession code PRJNA471163.

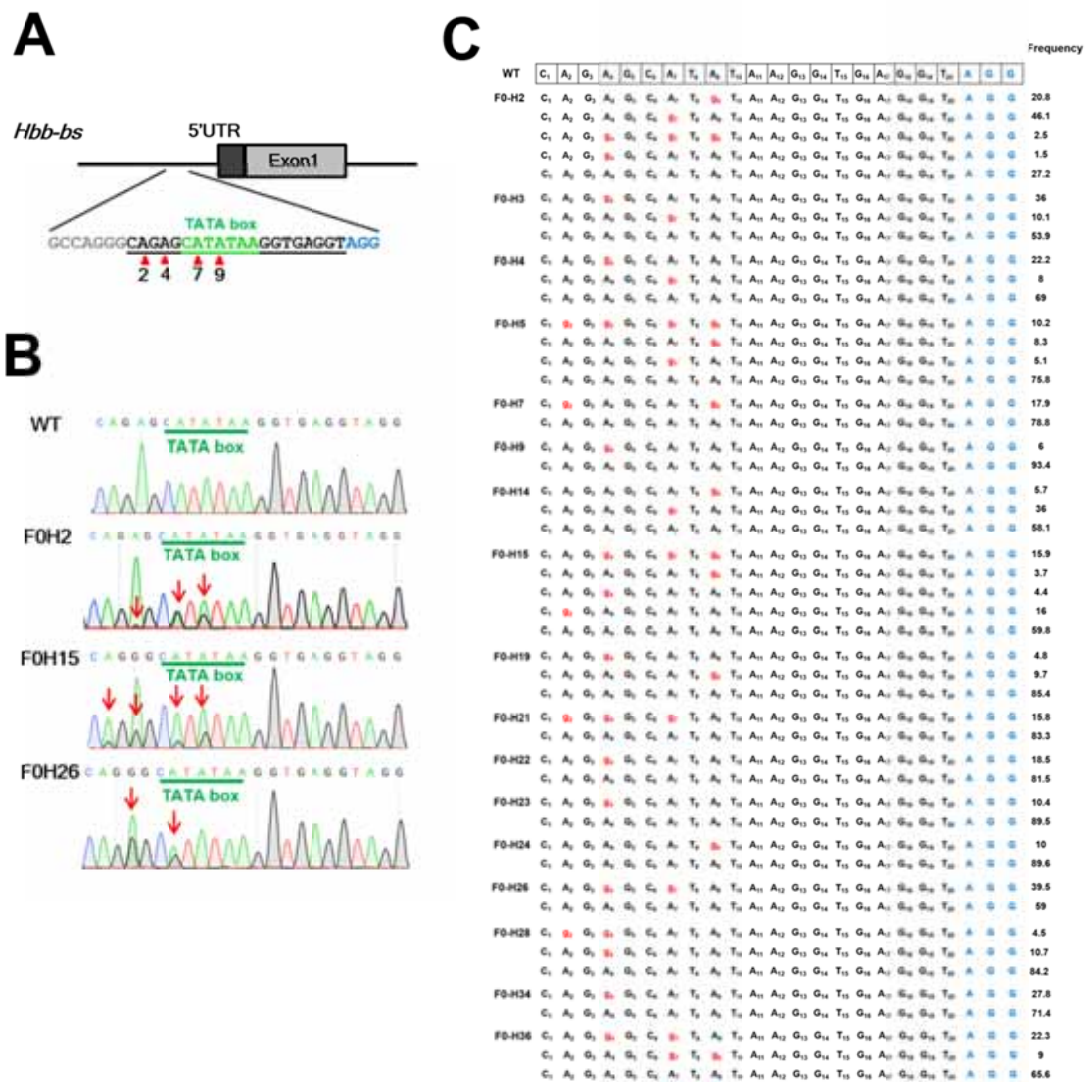

**Supplementary Figure 1. Efficient A>G conversion by ABE on mouse *Hbb-bs* gene** (A) schematic view of the target site in the *Hbb-bs* locus. Target sequence is underlined. PAM sequence is labeled in blue. TATA box is indicated by the green characters. Numbers represent the positions of the adenines within the editing window. (B) Sanger sequencing chromatograms of genomic DNA from WT and mutant F0 founders. Arrows indicate the double-peak signals caused by the A>G conversions (C) Deep sequencing results of the founders carrying mutations in the *Hbb-bs* locus. PAM sequences are labeled in blue. Base substitutions are labeled in red. Allele frequencies are listed to the right.

**A**

| No.    | Frequency (%) |      | No.    | Frequency (%) |      |
|--------|---------------|------|--------|---------------|------|
|        | T>C           | WT   |        | T>C           | WT   |
| F0-F2  | 54.1          | 45.8 | F0-F24 | 7.6           | 92.4 |
| F0-F3  | 19.2          | 80.8 | F0-F26 | 75            | 25   |
| F0-F4  | 57.2          | 42.6 | F0-F28 | 49.7          | 50.3 |
| F0-F5  | 55.4          | 44.3 | F0-F29 | 49.5          | 50.5 |
| F0-F6  | 10.3          | 89.6 | F0-F30 | 50.1          | 49.8 |
| F0-F7  | 48.9          | 51   | F0-F31 | 79.9          | 20.1 |
| F0-F9  | 54.2          | 45.7 | F0-F32 | 99            | 0    |
| F0-F10 | 77.6          | 22.3 | F0-F33 | 13.5          | 86.4 |
| F0-F11 | 59.4          | 40.6 | F0-F34 | 91.2          | 8.8  |
| F0-F12 | 40.8          | 59.1 | F0-F36 | 9.6           | 90.4 |
| F0-F14 | 33.2          | 66.1 | F0-F37 | 73            | 26.9 |
| F0-F15 | 48.3          | 51.7 | F0-F38 | 39            | 61   |
| F0-F16 | 33.2          | 66.4 | F0-F39 | 22            | 77.9 |
| F0-F17 | 24.4          | 75.6 | F0-F41 | 52.2          | 47.8 |
| F0-F18 | 43.8          | 56.1 | F0-F42 | 22.4          | 77.5 |
| F0-F19 | 49.6          | 50.3 | F0-F44 | 17.2          | 82.5 |
| F0-F20 | 28.3          | 71.5 | F0-F45 | 40.8          | 59.2 |
| F0-F21 | 77            | 23   | F0-F46 | 48.3          | 51.4 |
| F0-F22 | 38.7          | 61   | F0-F47 | 23.1          | 76.8 |
| F0-F23 | 46            | 54   |        |               |      |

**B**

| No.    | Frequency (%) |      | No.     | Frequency (%) |      |
|--------|---------------|------|---------|---------------|------|
|        | T>C           | WT   |         | T>C           | WT   |
| F0-hF1 | 65.5          | 34.5 | F0-hF8  | 86.2          | 13.8 |
| F0-hF2 | 65.7          | 34.3 | F0-hF9  | 62.4          | 37.6 |
| F0-hF3 | 86.1          | 13.6 | F0-hF10 | 83.4          | 16.6 |
| F0-hF4 | 82.9          | 16.6 | F0-hF11 | 62.5          | 37.5 |
| F0-hF5 | 73.5          | 26.4 | F0-hF12 | 50.2          | 49.8 |
| F0-hF6 | 71.6          | 28.4 | F0-hF13 | 72            | 28   |
| F0-hF7 | 56.8          | 43.2 |         |               |      |

**C**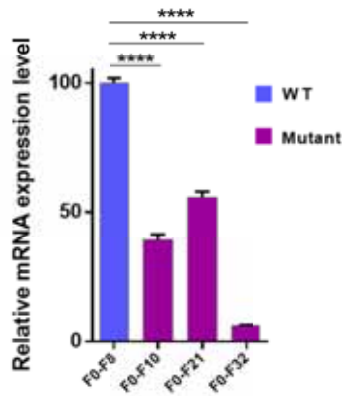**D**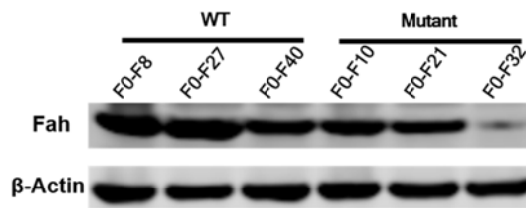

**Supplementary Figure 2. Disruption of the stop codon on the mouse *Fah* gene via ABE** (A-B) Allelic frequencies of each founder mutated by ABE via low sgRNA concentration (A) or high sgRNA concentration (B). (C) Relative mRNA expression of *Fah* gene from WT and three mutant F0 founders. Data presented as Mean ± SD (replicate = 3). \*\*\*,  $p < 0.01$ . (D) Western blot analysis of *Fah* expression in the liver tissue from the WT and mutant F0 founders.

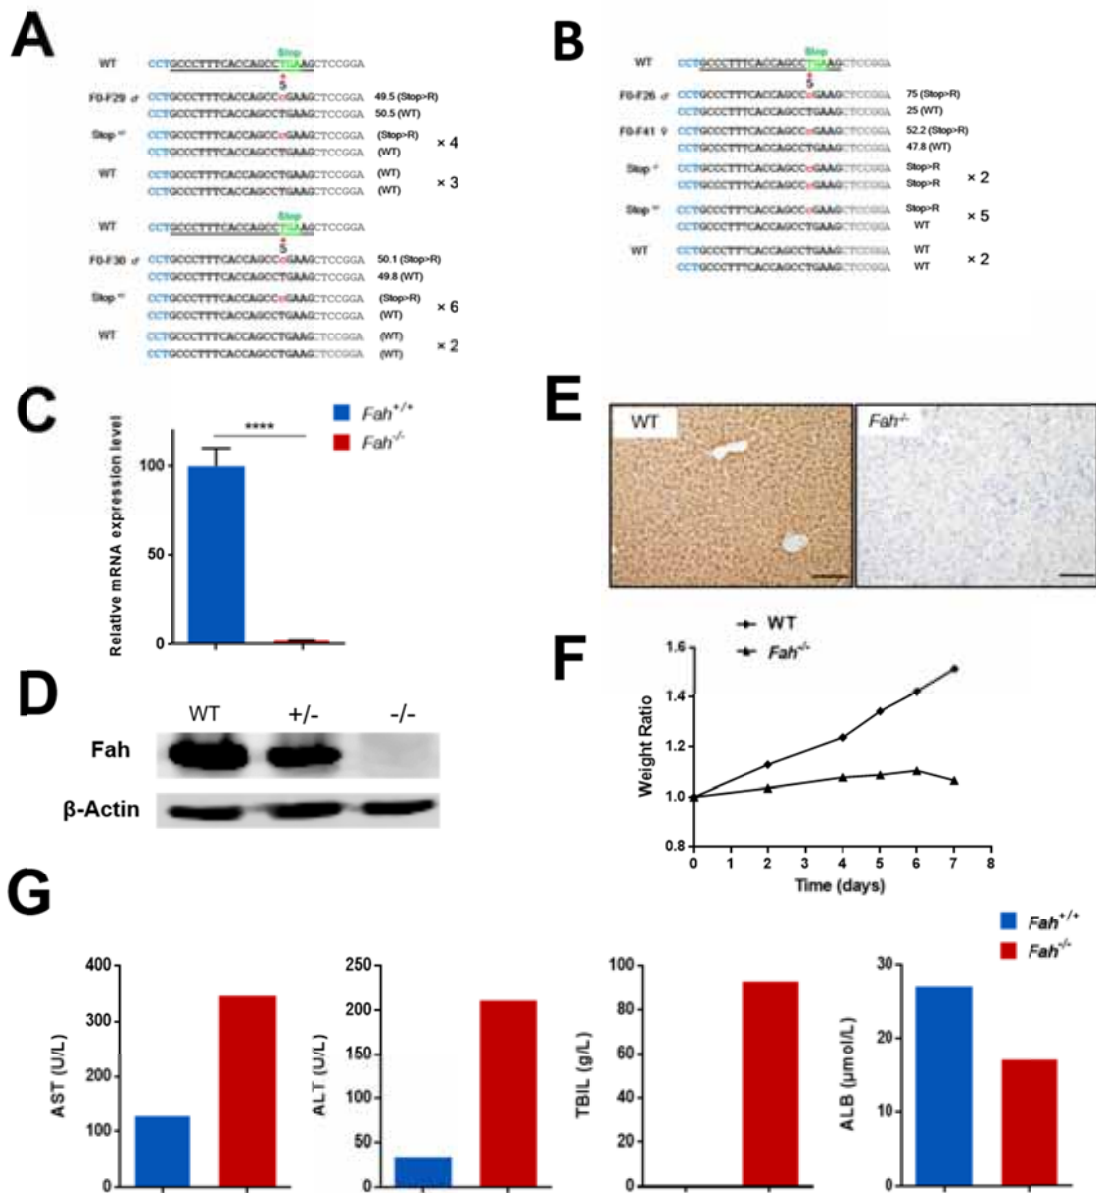

**Supplementary Figure 3. Pathological defects of F1 homozygotes generated by the ABE system** (A-B) Germline transmission of mutations at the *Fah* stop codon through crossing founders with WT mice (A) or crossing between founders (B). (C) *Fah* mRNA expression in *Fah*<sup>+/+</sup> and *Fah*<sup>-/-</sup> mouse liver tissue. Data presented as Mean ± SD. \*\*\*,  $p < 0.01$ . (D) Western blot analysis of *Fah* expression in the liver tissue from WT, heterozygous and homozygous offspring. (E) IHC staining of *Fah* protein on liver sections from WT and *Fah*<sup>-/-</sup> mouse. Scale bar, 100  $\mu$ m. (F) Body weight ration of WT and *Fah*<sup>-/-</sup> mouse after NTBC withdrawal. (G) Serum AST, ALT, TBIL and ALB levels of WT and *Fah*<sup>-/-</sup> mice, 7 days after NTBC withdraw.

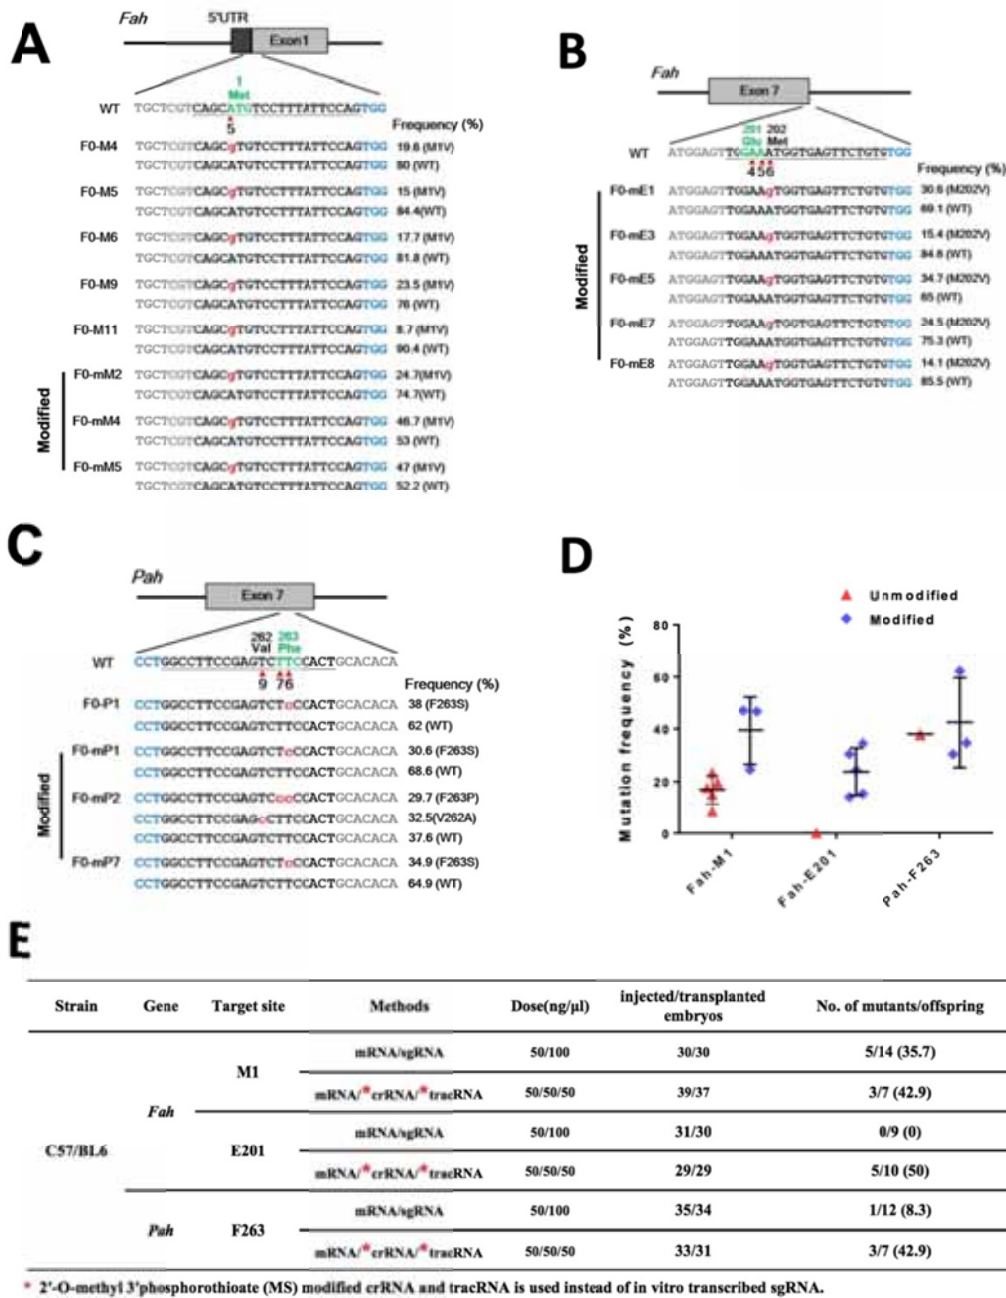

**Supplementary Figure 4. Increasing ABE efficiency through increasing sgRNA stability (A-C)** Mutation frequencies in individual mice induced by ABE with chemically modified cr-tracrRNAs in *Fah*-E201 site (A), *Fah*-M1 site (B) and *Pah*-F263 site (C). PAM sequences are labeled in blue. Base substitutions are labeled in red. Allele frequencies are listed to the right. (D) The average mutation frequencies in each founder obtained via injection of modified crRNA/tracrRNAs or unmodified sgRNAs. (E) Micro-injection parameters used to inject ABE mRNA along with modified cr-tracrRNAs or unmodified sgRNAs



**A**

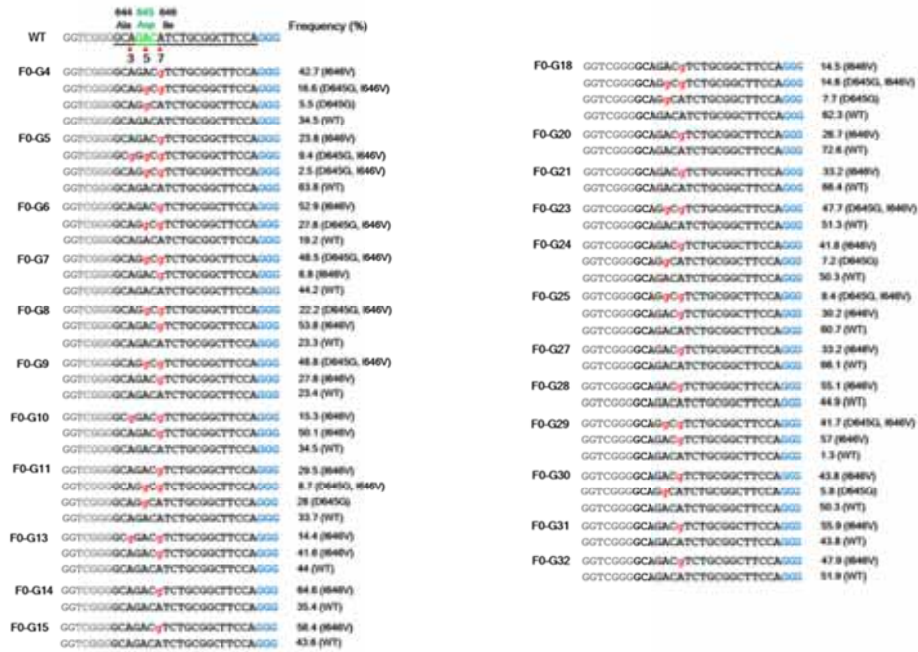

**B**

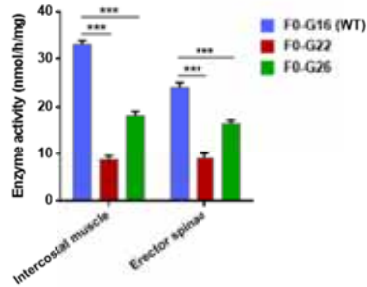

**C**

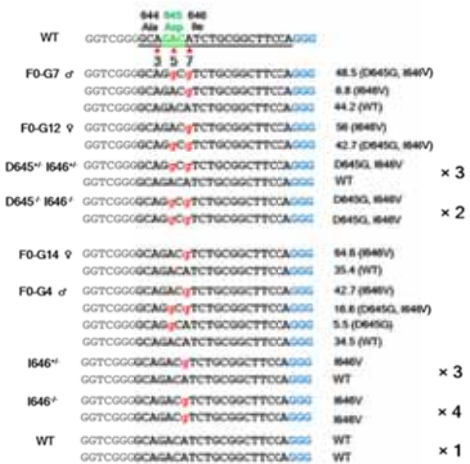

**D**

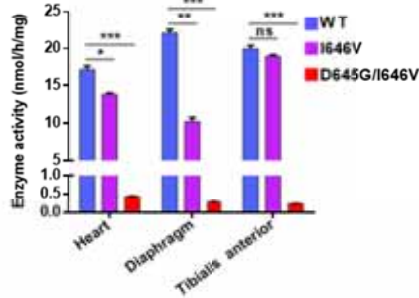

**E**

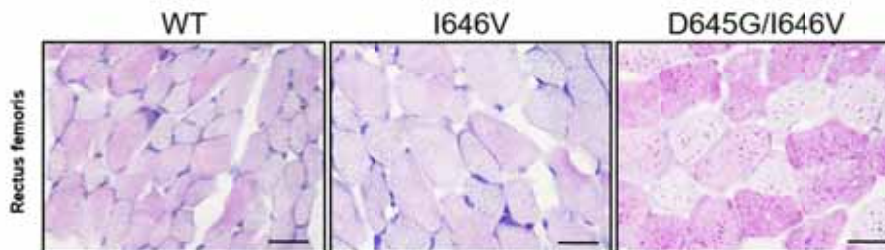

**Supplementary Figure 5. Generation of acid alpha-glucosidase mutant rats through the ABE system** (A) Mutation frequencies of individual rat induced by ABE in the *Gaa* locus. PAM sequences are labeled in blue. Base substitutions are labeled in red. Allele frequencies are listed to the right. (B) *Gaa* enzyme activities in intercostal muscle and erector spinae from 4 week old WT and mutant founders. Data presented as Mean  $\pm$ SD. (replicate = 3). \*\*\*,  $p < 0.01$ . (C) Germline transmission of mutations at the *Gaa* locus through crossing founders with other founders. PAM sequences are labeled in blue. Base substitutions are labeled in red. F1rat quantities are listed to the right. (D) *Gaa* enzyme activities in heart, diaphragm, and tibialis anterior from 3 week old WT, I656V and D645G/I646V homozygous rats. Data presented as Mean  $\pm$  SD. (replicate = 3). \*,  $P < 0.05$ . \*\*\*,  $P < 0.01$ . (E) PAS staining of rectus femoris cryosections from WT, I646V and D645G/I646V homozygous rats. Scale bar, 20  $\mu$ m.

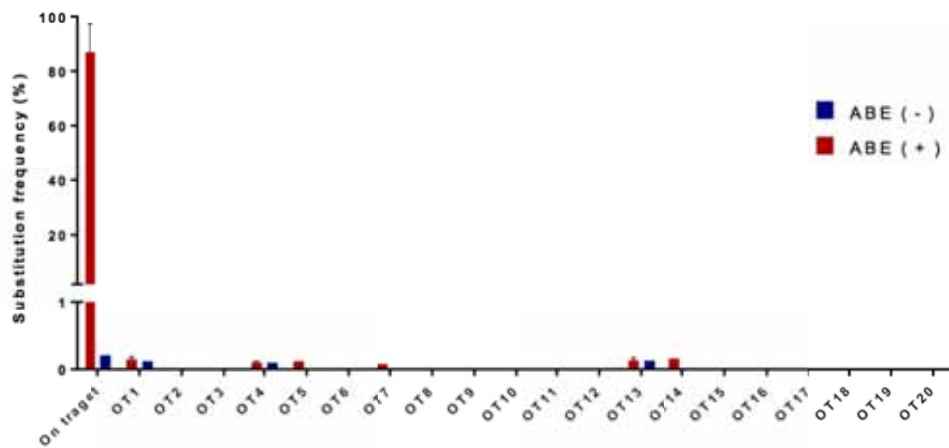

**Supplementary Figure 6. Editing frequencies of ABE in predicted off target sites.**

Base editing frequencies of ABE at potential off target sites of Fah-stop predicted by <http://crispr.mit.edu/> were measured by Hi-Tom deep sequencing. Genomic DNA from 4 week old mouse tail tips was extracted and pcr amplified for Hi-Tom deep sequencing.

**Supplementary Table 1.** Target sites in mouse embryos, and HEK293T cells.

|                       |                      | <b>No.</b>    | <b>Sequence (5'-3')</b>    |
|-----------------------|----------------------|---------------|----------------------------|
| <b>ABE</b>            | <b>Mouse embryos</b> | Fah-stop      | CTTCAGGCTGGTGAAAGGGCAGG    |
|                       |                      | Fah-E201      | TGGAAATGGTGAGTTCTGTGTGG    |
|                       |                      | Fah-M1        | CAGCATGTCCTTTATTCCAGTGG    |
|                       |                      | Pah-F263      | AGTGGAAGACTCGGAAGGCCAGG    |
|                       |                      | GAA-D645      | GCAGACATCTGCGGCTTCCAGGG    |
|                       |                      | Hbb-bs        | CAGAGCATATAAGGTGAGGTAGG    |
| <b>SaKKH-<br/>ABE</b> | <b>HEK293T cells</b> | EMX1 site 1   | CGGATGCACGGTCAGCGCGGGGTGGT |
|                       |                      | EMX1 site 2   | CAACCACAAACCCACGAGGGCAGAGT |
|                       |                      | RUNX1 site 1  | AAAGAGAGATGTAGGGCTAGAGGGGT |
|                       |                      | Hek293 site 1 | AGAGACACAGAGATGTCATGGAGAGT |
|                       | <b>Mouse embryos</b> | Otc           | CACAAGACATTCACCTGGGTGTGAAT |
| <b>VQR-ABE</b>        | <b>HEK293T cells</b> | VEGFA Site 1  | GCGAGCAGCGTCTTCGAGAGTGAG   |
|                       |                      | VEGFA Site 2  | AAACAGAGAACTAAGGGAAAGAC    |
|                       |                      | RUNX1 site 3  | AGAAAGAGAGATGTAGGGCTAGAG   |
|                       |                      | RUNX1 site 4  | CAGAAGAGGGTGCATTTTCAGGAG   |
|                       | <b>Mouse embryos</b> | Hbb-bs        | AGAGCATATAAGGTGAGGTAGGAT   |

**Supplementary Table 2.** Potential off-target sites of Fah-stop sgRNA in the mouse genome.

| No.       | Sequence (5'-3')         | Chromosome | Position  | Direction | Mismatches |
|-----------|--------------------------|------------|-----------|-----------|------------|
| on target | CTTCAGGCTGGTCAAAGGGCAGG  | chr7       | 91733777  | -         | 0          |
| OT1       | CTTgAGGCTGGTAAAAGGGCTGG  | chr2       | 110803644 | +         | 2          |
| OT2       | CaTgAGtCTGGTCAAAGGGCTGG  | chr7       | 124292990 | +         | 3          |
| OT3       | CTTAgGGCTGGgCAAAGGGCAGG  | chr9       | 45541246  | +         | 3          |
| OT4       | tTTCAGGCTGccCAAAGGGCAGG  | chr15      | 67559328  | +         | 3          |
| OT5       | CcTCAGGCaGGTCAAAtGGCAGG  | chr19      | 58733308  | +         | 3          |
| OT6       | CTTCAGGCaaGTCAAAGGaCAGG  | chr18      | 52821719  | -         | 3          |
| OT7       | CTTCAGtCTGaTAAAAGGGCAGG  | chr7       | 118609893 | -         | 3          |
| OT8       | CaTtAaGCTtGTCAAAGGGCAGG  | chr9       | 15919356  | -         | 4          |
| OT9       | gTcCAGGCTttTCAAAGGGCGGG  | chrX       | 3518390   | -         | 4          |
| OT10      | CTgggGGCTGGTCAAAtGGCAGG  | chr4       | 62063879  | +         | 4          |
| OT11      | ggTCAtGCTGGTCAAAtGGCTGG  | chr8       | 9242931   | -         | 4          |
| OT12      | CTTggGGCTaGTGAcAGGGCTGG  | chr6       | 56312390  | +         | 4          |
| OT13      | CTaCcGaCTGGTcAAAAGGGCTGG | chr4       | 138147304 | -         | 4          |
| OT14      | CTTAgGtCTGGTcAAAAGGGCAGG | chr4       | 34446483  | -         | 4          |
| OT15      | CaTcTGGaTGGTCAAAGGGtGGG  | chr15      | 38502392  | +         | 4          |
| OT16      | gTcCAGGCTGcTCAAAGGGaTGG  | chr16      | 70689741  | +         | 4          |
| OT17      | CTaCAGcaTGGaCAAAGGGCTGG  | chr2       | 80450019  | -         | 4          |
| OT18      | CTTggGgCTGGgCAAAGGGCTGG  | chr7       | 87740211  | -         | 4          |
| OT19      | CTTtcaGCTGGaCAAAGGGCTGG  | chr3       | 149023365 | -         | 4          |
| OT20      | gccCAGGCTGGTGAgAGGGCTGG  | chr14      | 67495093  | -         | 4          |

**Supplementary Table 3.** List of primers used for plasmid construction.

| <b>Sequence ID</b> | <b>Sequence (5'-3')</b>                                  |
|--------------------|----------------------------------------------------------|
| ABE7.10-F          | AGATCCGCTAGAGATCCGCGGCCGCCACCATGAGCGAGGTGGA              |
| ABE7.10-F(in)      | GAGGCTCTTCTGGAGGATCAGATAAAAAGTATTCTATTGGTTTAGCC          |
| ABE7.10-R(in)      | TGATCCTCCAGAAGAGCCTCCG                                   |
| ABE7.10-R          | CGAGGCTGATCAGCGGGTTTAAACTTAGACTTTCCTCTTCTTCTTGGG         |
| saKKH-ABE-F        | AGATCCGCTAGAGATCCGCGGCCGCCACCATGAGCGAGGTGGA              |
| SaKKH-ABE-F(in)    | CAGCGGAGGCTCTTCTGGAGGATCAAAAAGGAACTACATTCTGGGGCTGGCC     |
| SaKKH-ABE-R(in)    | GTTCTTTTTGATCCTCCAGAAGAGCCTCCGCTGCTCT                    |
| SaKKH-ABE-R        | ACAGTCGAGGCTGATCAGCGGGTTTAAACTTAAGCGTAATCTGGTACGTCGTATGG |

**Supplementary Table 4.** List of primers used for q-PCR and RT-PCR.

| <b>Sequence ID</b> | <b>Sequence (5'-3')</b> |
|--------------------|-------------------------|
| Fah-qPCR-F         | CTTCGGCAGCGTGCATTC      |
| Fah-qPCR-R         | GCCATGGTATCCCACAGGTA    |
| Mouse-Actin-F      | GTGTGACGTTGACATCCGTAA   |
| Mouse-Actin-R      | CCACCGATCCACACAGAGTA    |

**Supplementary Table 5.** List of Oligonucleotides and Primers used for sgRNA and mRNA preparation.

| <b>sequence ID</b> | <b>Sequence (5'-3')</b>                         |
|--------------------|-------------------------------------------------|
| Fah-stop-up        | TAGGCTTCAGGCTGGTGAAAGGGC                        |
| Fah-stop-dn        | AAACGCCCTTTCACCAGCCTGAAG                        |
| Fah-E201-up        | TAGGGTGGAAATGGTGAGTTCTGTG                       |
| Fah-E201-dn        | AAACCACAGAACTCACCATTTCAC                        |
| Fah-M1-up          | TAGGCAGCATGTCCTTTATTCCAG                        |
| Fah-M1-dn          | AAACCTGGAATAAAGGACATGCTG                        |
| Pah-F263-up        | TAGGAGTGGAAAGACTCGGAAGGCC                       |
| Pah-F263-dn        | AAACGGCCTTCCGAGTCTTCCACT                        |
| GAA-D645-up        | TAGGGCAGACATCTGCGGCTTCCA                        |
| GAA-D645-dn        | AAACTGGAAGCCGCAGATGTCTGC                        |
| Hbb-bs-TATA-up     | TAGGCAGAGCATATAAGGTGAGGT                        |
| Hbb-bs-TATA-dn     | AAACACCTCACCTTATATGCTCTG                        |
| EMX1-site2-up      | CACCGCAACCACAAACCCACGAGGG                       |
| EMX1-site2-dn      | AAACCCCTCGTGGGTTTGTGGTTGC                       |
| EMX1-site1-up      | CACCGCGGATGCACGGTCAGCGCGG                       |
| EMX1-site1-dn      | AAACCCGCGCTGACCGTGCATCCGC                       |
| HEK293 site 2-up   | CACCGAGAGACACAGAGATGTCATG                       |
| HEK293 site 2-dn   | AAACCATGACATCTCTGTGTCTCTC                       |
| RUNX1-site1-up     | CACCGAAAGAGAGATGTAGGGCTAG                       |
| RUNX1-site1-dn     | AAACCTAGCCCTACATCTCTCTTTC                       |
| VEGFA-site1-up     | CACCGCGAGCAGCGTCTTCGAGAG                        |
| VEGFA-site1-dn     | AAACCTCTCGAAGACGCTGCTCGC                        |
| VEGFA-site2-up     | CACCGAAACAGAGAACTAAGGGAA                        |
| VEGFA-site2-dn     | AAACTTCCCTTAGTTTCTCTGTTTC                       |
| RUNX1-site3-up     | CACCGAGAAAGAGAGATGTAGGGCT                       |
| RUNX1-site3-dn     | AAACAGCCCTACATCTCTCTTCTC                        |
| RUNX1-site4-up     | CACCGCAGAAGAGGGTGCATTTTCA                       |
| RUNX1-site4-dn     | AAACTGAAAATGCACCTCTTCTGC                        |
| Hbb-bs-up          | TAGGAGAGCATATAAGGTGAGGTA                        |
| Hbb-bs-dn          | AAACTACCTCACCTTATATGCTCT                        |
| Mouse-Otc- T7-up   | TAGGCACAAGACATTCACTTGGGT                        |
| Mouse-Otc- T7-dn   | AAACACCCAAGTGAATGTCTTGTG                        |
| IVT-PCF-F          | GCGGCTTTGTTGAATAAATCGCATTTCG                    |
| IVF-PCR-R(sp)      | AGAGGATCCTTAAAAAGCACCGACTCGGTGCC                |
| IVF-PCR-R(sa)      | GAGGATCCAAAAAATCTCGCCAACAAGTTGACGA              |
| IVT-T7-ABE7.10-F   | TTAATACGACTCACTATAGGGAGAGCCGCCACCATGAGCGAGGTGGA |
| IVT-T7-ABE7.10-R   | TCCGCCTCAGAAGCCATAGA                            |
| IVT-T7-saKKH-ABE-F | TTAATACGACTCACTATAGGGAGAATGAGCGAGGTGGAGTTCAGCC  |
| IVT-T7-saKKH-ABE-R | TTCGAGGCTGATCAGCGGGTTAAACTT                     |



**Supplementary Table 6.** List of primers used for targeted deep sequencing.

| <b>sequence ID</b>     | <b>Sequence (5'-3')</b>                     |
|------------------------|---------------------------------------------|
| Fah-stop- hi-tom-F     | GGAGTGAGTACGGTGTGCCAGTGATGTGGCTGATCCCA      |
| Fah-stop- hi-tom-R     | GAGTTGGATGCTGGATGGACTGATGCAGTGGTAGCATGA     |
| Fah-E201- hi-tom-F     | GGAGTGAGTACGGTGTGCAGCTCTGTAGCCTGGTATTGATG   |
| Fah-E201- hi-tom-R     | GAGTTGGATGCTGGATGGCCAAACAGGTGTGAAGTGCCG     |
| Pah-F263- hi-tom-F     | GGAGTGAGTACGGTGTGCCTTTCCAGCTTGTACTGGTTTC    |
| Pah-F263- hi-tom-F-R   | GAGTTGGATGCTGGATGGTTTGAGCATCCATTGTGGTTGG    |
| Fah-M1- hi-tom-F       | GGAGTGAGTACGGTGTGCTAAAGGCCCTCGGCTAGTCT      |
| Fah-M1- hitom-R        | GAGTTGGATGCTGGATGGGCTCACGTTGCTTTGAGTGG      |
| GAA-D645- hi-tom-F     | GGAGTGAGTACGGTGTGCTTGTAACCTGGCACCCTC        |
| GAA-D645- hi-tom-R     | GAGTTGGATGCTGGATGGAGGTCATTGTGGTTCCGCAT      |
| Hbb-bs-F               | TTGTCATCACCGAAGCCTGAT                       |
| Hbb-bs-R               | AAGCACCAACTTCTTGTGAG                        |
| Hbb-bs- hi-tom-F       | GGAGTGAGTACGGTGTGCGATTCCGTAGAGCCACACCC      |
| Hbb-bs- hi-tom-R       | GAGTTGGATGCTGGATGGCAGCAGCCTTCTCAGCATCA      |
| EMX1-site2- hi-tom-F   | GGAGTGAGTACGGTGTGCAAGAAGGGCTCCCATCACATCAACC |
| EMX1-site2- hi-tom-R   | GAGTTGGATGCTGGATGGGAGTGGCCAGAGTCCAGCTGGG    |
| EMX1-site1- hi-tom-F   | GGAGTGAGTACGGTGTGCCTTCGTGAGTGGCTTCCCTGCC    |
| EMX1-site1- hi-tom-F   | GAGTTGGATGCTGGATGGGAAGAAGGAGTGCGGGGGCTG     |
| RUNX1-site1- hi-tom-F  | GGAGTGAGTACGGTGTGCTTTAATAGGGCTTGGGGAGTCCCAG |
| RUNX1-site1- hi-tom-R  | GAGTTGGATGCTGGATGGCATCGCTTCTCCTGAAAATGCACC  |
| HEK293 site2- hi-tom-F | GGAGTGAGTACGGTGTGCCTGGGTAAGGTCTACTGTGA      |
| HEK293 site2- hi-tom-R | GAGTTGGATGCTGGATGGTCATTAATAAATTACAAAAG      |
| VEGFA-site1- hi-tom-F  | GGAGTGAGTACGGTGTGCGTGTGCAGACGGCAGTCACTAGG   |
| VEGFA-site1- hi-tom-R  | GAGTTGGATGCTGGATGGCTATTGGAATCCTGGAGTGACCCCT |
| VEGFA-site2- hi-tom-F  | GGAGTGAGTACGGTGTGCTGAGCAATGAACCATTGGAAGTGA  |
| VEGFA-site2- hi-tom-R  | GAGTTGGATGCTGGATGGACCACTCCAGCAGAGACAACAACAT |
| RUNX1-site3- hi-tom-F  | GGAGTGAGTACGGTGTGCTTTAATAGGGCTTGGGGAGTCCCAG |
| RUNX1-site3- hi-tom-R  | GAGTTGGATGCTGGATGGCATCGCTTCTCCTGAAAATGCACC  |
| RUNX1-site4- hi-tom-F  | GGAGTGAGTACGGTGTGCTTTAATAGGGCTTGGGGAGTCCCAG |
| RUNX1-site4- hi-tom-R  | GAGTTGGATGCTGGATGGCATCGCTTCTCCTGAAAATGCACC  |
| Mouse-Otc- hi-tom-F    | GGAGTGAGTACGGTGTGCATAGCTGGTGCAAGTACTGATGCCT |
| Mouse-Otc- hi-tom-R    | GAGTTGGATGCTGGATGGTCTGTGAGACTTTCATTCACACCCA |

**Supplementary Table 7.** List of primers used for deep sequencing of potential off-target sites of Fah-stop site.

| <b>sequence ID</b> | <b>Sequence (5'-3')</b>                    |
|--------------------|--------------------------------------------|
| Fah-stop-OT1-F     | GGAGTGAGTACGGTGTGCTATCCTTCAACGCTCTCCTTGAT  |
| Fah-stop-OT1-R     | GAGTTGGATGCTGGATGGTTGACACTGTGACTTGTGGCT    |
| Fah-stop-OT2-F     | GGAGTGAGTACGGTGTGCTTGCAGTGAAGTACCAACC      |
| Fah-stop-OT2-R     | GAGTTGGATGCTGGATGGTGGACATTTCTATGCCTGTGTTAG |
| Fah-stop-OT3-F     | GGAGTGAGTACGGTGTGCTTCCCTCAGACAGGAGCAGGT    |
| Fah-stop-OT3-R     | GAGTTGGATGCTGGATGGTGCAGATCTGTGGCTGATGG     |
| Fah-stop-OT4-F     | GGAGTGAGTACGGTGTGCTCTGGCAGAAATGTTCTCATCC   |
| Fah-stop-OT4-R     | GAGTTGGATGCTGGATGGAAAAGCATCCGTGGCTGTATC    |
| Fah-stop-OT5-F     | GGAGTGAGTACGGTGTGCCACACAGATGGAAAGGGGGA     |
| Fah-stop-OT5-R     | GAGTTGGATGCTGGATGGAGACCCCATCCAAACCTCT      |
| Fah-stop-OT6-F     | GGAGTGAGTACGGTGTGCATGATGGTGGCAATCCCTG      |
| Fah-stop-OT6-R     | GAGTTGGATGCTGGATGGGTATGGGTGAGGAGATGCCA     |
| Fah-stop-OT7-F     | GGAGTGAGTACGGTGTGCCATGCATCATGGTGCTAAAAGTG  |
| Fah-stop-OT7-R     | GAGTTGGATGCTGGATGGAAACTGTCCAAGATGTGACCC    |
| Fah-stop-OT8-F     | GGAGTGAGTACGGTGTGCATGCTCCCAACTGGGTCAA      |
| Fah-stop-OT8-R     | GAGTTGGATGCTGGATGGTATTAGCACGTCCTATGGGCA    |
| Fah-stop-OT9-F     | GGAGTGAGTACGGTGTGCCAAAGGCAAATGACCTGGACC    |
| Fah-stop-OT9-R     | GAGTTGGATGCTGGATGGAAAGCCTGAATTTGCGCGG      |
| Fah-stop-OT10-F    | GGAGTGAGTACGGTGTGCACTCCTCAATGTCGTCGAGC     |
| Fah-stop-OT10-R    | GAGTTGGATGCTGGATGGACTGTTCTGTGTACAGATTTCAT  |
| Fah-stop-OT11-F    | GGAGTGAGTACGGTGTGCAGGGTTAGTCTCAAAGAGGGGT   |
| Fah-stop-OT11-R    | GAGTTGGATGCTGGATGGTACTCAGATCTGCTACAAGAGA   |
| Fah-stop-OT12-F    | GGAGTGAGTACGGTGTGCCAAGCCCTGCTGACATGCAA     |
| Fah-stop-OT12-R    | GAGTTGGATGCTGGATGGCGGGCAGCCATCATTGTAGG     |
| Fah-stop-OT13-F    | GGAGTGAGTACGGTGTGCGGACACTGGAGGCCCTTCTAT    |
| Fah-stop-OT13-R    | GAGTTGGATGCTGGATGGATCCCACTGGGGACAATGATAC   |
| Fah-stop-OT14-F    | GGAGTGAGTACGGTGTGCCAGGGATCTCAAAAATCTAGCC   |
| Fah-stop-OT14-R    | GAGTTGGATGCTGGATGGTAAGGCACTGCAGGTAACCTCC   |
| Fah-stop-OT15-F    | GGAGTGAGTACGGTGTGCATGAGGGTGTACCTTAGAGAGGC  |
| Fah-stop-OT15-R    | GAGTTGGATGCTGGATGGAGGATGGCGTCAGCAGCAA      |
| Fah-stop-OT16-F    | GGAGTGAGTACGGTGTGCTCTGAGTGTTCCTTTCAGCCATA  |
| Fah-stop-OT16-R    | GAGTTGGATGCTGGATGGCATGAAGGCATGCTAAGTGA AAC |
| Fah-stop-OT17-F    | GGAGTGAGTACGGTGTGCACCCAGCTCCATTGCTTTCA     |
| Fah-stop-OT17-R    | GAGTTGGATGCTGGATGGTCTAACGGGGTAACCAAAGC     |
| Fah-stop-OT18-F    | GGAGTGAGTACGGTGTGCGGGGTTTTTCTCTGTGATTTCG   |

|                 |                                              |
|-----------------|----------------------------------------------|
| Fah-stop-OT18-R | GAGTTGGATGCTGGATGGTAGCAGGTTTGTGATGTTTATGC    |
| Fah-Stop-OT19-F | GGAGTGAGTACGGTGTGCGAGGGTGTGTGGCTTCAACTG      |
| Fah-stop-OT19-R | GAGTTGGATGCTGGATGGTCTTGCAAAAAGTTTAAGAAGAGCCT |
| Fah-Stop-OT20-F | GGAGTGAGTACGGTGTGCCCTTCTAGATCGCAGCCTCTT      |
| Fah-stop-OT20-R | GAGTTGGATGCTGGATGGTGCTAGAGTAGGGCCAAGAAC      |

---

**Supplementary Sequences 1.** Amino acid sequences of ABE.

MSEVEFSHEYWMRHALTLAKRAWDEREVPVGAVLVHNNRVIGEGWN-  
RPIGRHDPTAHAEIMALRQGGLVMQNYRLIDATLYVTLEPCVMCAGAMIHSRIGRVVF-  
GARDAKTGAAGSLMDVLHHPGMNHRVEITEGILADECAALLSDFFRMRRQEIKAQK-  
KAQSSTDSGGSSGGSSGSETPGTSESATPESSGGSSGGSSSEVEFSHEYWMRHALTLAKRAR-  
DEREVPVGAVLVLNRRVIGEGWNRAIGLHDPTAHAEIMALRQGGLVMQNYRLIDATLYVT-  
FEPCVMCAGAMIHSRIGRVVFGVRNAKTGAAGSLMDVLHYPGMNHRVEITEGILADECAALL-  
CYFFRMPRQVFNAQKKAQSSTDSGGSSGGSSGSETPGTSESATPESSGGSSGGSSDKKYSIG-  
LAIGTNSVGWAVITDEYKVPSSKFKVLGNTDRHSIKKNLIGALLFDSGETAEATRL-  
KRTARRRYTRRKNRICYLQEIFSNEMAKVDDSEFFHRLSEESFLVEEDKKHERHPIFGNI-  
VDEVAYHEKYPTIYHLRKKLVDSITDKADLRLIYL-  
ALAHMIKFRGHFLIEGDLNPDNSDVKLFIQLVQTYNQLFEENPINASGVDAKAIL-  
SARLSKSRRENLIAQLPGEKKNGLFGNLIASLGLTPNFK-  
SNFDLAEDAQLSKDQYDDDLNLLAQIGDQYADLFLAAKNLSDAILSDILRVN-  
TEITKAPLSASMIKRYDEHHQDLTLLKALVRQQLPEKYKEIFFDQSKNGYAGYIDG-  
GASQEEFYKFIKPILEKMDGTEELLVKNLREDLLRKQRTFDNGSIPHQIHLGELHAIL-  
RRQEDFYFPLKDNREKIEKILTFRIPYYVGPLARGNSRFAMTRKSEETIT-  
PWNFEVVVDKGASAQSFIERMTNFDKNLPNEKVLPHKSLLYEYFTVYNELTKVKYVTEGMRK-  
PAFLSGEQKKAIVDLLFKTNRKVTVKQLKEDYFKKIECFDSVEISGVEDRF-  
NASLGTYYHDLKIIKDKDFLDNEENEDILEDIVLTLTLFEDREMI-  
EERLKYAHLFDDKVMKQLKRRRYTGWGRLSRKLINGIRDKQSGKTILDFLKSDFANRN-  
FMQLIHDDSLTFKEDIQKAQVSGQDLSLHEHIANLAGSPAIAKKGILQTVKVVDELVKVMGRHK-  
PENIVIEMARENQTTQKGQKNSRERMKRIEIEGKELGSQILKE-  
HPVENTQLQNEKLYLYLQNGRDMYVDQELD-  
INRLSDYDVDHIVPQSFLKDDSIDNKVLTRSDKNRSGKSDNVPSEEVVKKMKNY-  
WRQLLNAKLITQRKFDNLTKAERGGLSELDKAGFIKRQLVETRQITKHVAQILD SRM-  
NTKYDENDKLIREVKVITLKSCLVSDFRKDFQFYK VREINNYHHAHDAYLNAVVG TALIK-  
KYPKLESEFVYGDYKVVYDVRKMIKSEQEIGKATAKYFFYSNIMNFFKTEITLANGEIRKR-  
PLIETNGETGEIVWDKGRDFATVRKVL SMPQVNIVKKTEVQTGGF-  
SKESILPKRNSDKLIARKKDWDPK KYGGFDSPTVAYSVLVAKVEK GK-  
SKKLKSVKELLGITIMERSSEFEKNPIDFLEAKGYKEVKKDLIHKLPKYSLFELENGRKRMLA-  
SAGELQKGNELALPSKYVNFYLA SHYEKLG-  
SPEDNEQKQLFVEQHKHYLDEIIEQISEFSKRVLADANLDKVL SAYNKHRDKPIREQAE-  
NIIHLFTLNLGAPAAFKYFDTTIDRKRYTSTKEVL DATLIHQ SITGLYETRIDLSQLGG-  
DSGGSPKKKRKV\*

**Supplementary Sequences 2.** Amino acid sequences of SaKKH-ABE.

MSEVEFSHEYWMRHALTLAKRAWDEREVPVGAVLVHNNRVIGEGWN-  
RPIGRHDPTAHAEIMALRQGGLVMQNYRLIDATLYVTLEPCVMCAGAMIHSRIGRVVF-  
GARDAKTGAAGSLMDVLHHPGMNHRVEITEGILADECAALLSDFFRMRRQEIKAK-  
KAQSSTDSGGSSGGSSGSETPGTSESATPESSGGSSGSSEVEFSHEYWMRHALTLAKRAR-  
DEREVPVGAVLVLNRRVIGEGWNRAIGLHDPTAHAEIMALRQGGLVMQNYRLIDATLYVT-  
FEPCVMCAGAMIHSRIGRVVFGVRNAKTGAAGSLMDVLHYPGMNHRVE-  
ITEGILADECAALLCYFFRMPRQVFNAQKKAQSSTDSGGSSGGSSGS-  
ETPGTSESATPESSGGSSGGSKRNYILGLAIGITSVGYGI-  
IDYETRDVIDAGVRLFKEANVENNEGRRSKRGARRL-  
KRRRRHRIQRVKKLLFDYNLLTDHSELGINPYEARVKGLSQKLSEEFSAALL-  
HLAKRRGVHNVNEVEEDTGNELSTKEQISRNSKALEEKYVAELQLERLKKDGEVRG-  
SINRFKTSDYVKEAKQLKVKAYHQLDQSFIDTYIDLLETRRTYYEGPGE-  
SPFGWKDIKEWYEMLMGHCTYFPEELRSVKYAYNADLYNALNDLNNL-  
VITRDENEKLEYEYEFQIENVFKQKKKPTLKQIAKEILVNEEDIKGYRVTSTGKPEFT-  
NLKVYHDIKDITARKEIENAEELLDQIA-  
KILTIYQSSEDIQEELTNLNSLTQEEIEQISNLKGYTGTHNLSLKAINLILDELWHTND-  
NQIAIFNRLKLVPKKVDLSQQKEIPTTLVDDFILSPVVKRSFIQSIKVINAIK-  
KYGLPNDIIIELAREKNSKDAQKMINEMQKRNRQTNERIEEIIIRTTGKENAKYLIEKI-  
KLHDMQEGKCLYSLEAIPLEDLLNPNFYVDHIIIPRSVSFDNSFNN-  
KVLVQKEENSKKGNRTPFQYLSSDSKISYETFKKHILNLAAGKGRIS-  
KTKKEYLLEERDINRFSVQKDFINRNLVDTRYATRGLMNLLRSYFRVNNLDVKVKS-  
INGGFTSFLRRKWKFKKERNKGYKHAEDALIINANAD-  
FIFKEWKKLDKAKKVMENQMFEKQAESMPEIETEQEYKEIFITPHQIKHIK-  
DFKDYKYSHRVDKKPNRKLINDTLYSTRKDDKGNTLIVNNLNGLYDKDNDKLLKLINK-  
SPEKLLMYHHDPPQTYQKLKLIMEQYG-  
DEKNPLYKYYEETGNLYLTKYSKKDNGPVIKKIKYYGNKLNLAHLDITDDYPNSRN-  
KVVKLSLKPYRFDVYLDNGVYKFVTVKNLVDVIKKENYYEVNSKCYEEAKLKKISNQAE-  
FIASFYKNDLIKINGELYRVIGVNNDLLNRIEVMIDITYREYLENMNDKRPPHIK-  
TIASKTQSIKKYSTDILGNLYEVKSKKHPQIIKKGGSPKKRKRKVSSYPYDVPDYA\*

**Supplementary Sequences 3.** Amino acid sequences of VQR-ABE.

MSEVEFSHEYWMRHALTLAKRAWDEREVPVGAVLVHNNRVIGEGWN-  
RPIGRHDPTAHAEIMALRQGGLVMQNYRLIDATLYVTLEPCVMCAGAMIHSRIGRVVF-  
GARDAKTGAAGSLMDVLHHPGMNHRVEITEGILADECAALLSDFFRMRRQEIKAK-  
KAQSSTDSGGSSGGSSGSETPGTSESATPESSGGSSGSSEVEFSHEYWMRHALTLAKRAR-  
DEREVPVGAVLVNRRVIGEGWNRAGLHDPTAHAEIMALRQGGLVMQNYRLIDATLYVT-  
FEPCVMCAGAMIHSRIGRVVFGVRNAKTGAAGSLMDVLHYPGMNHRVE-  
ITEGILADECAALLCYFFRMQRQVFNAQKKAQSSTDSGGSSGGSSGS-  
ETPGTSESATPESSGGSSGGSDKKYSIG-  
LAIGTNSVGVAVITDEYKVPSSKFKVLGNTDRHSIKKNLIGALLFDSGETAEATRL-  
KRTARRRYTRRKNRICYLQEIFSNEMAKVDDSSFFHRLEESFLVEEDKKHERHPIFGNI-  
VDEVAYHEKYPTIYHLRKKLVDSTDKADLRLIYL-  
ALAHMIKFRGHFLIEGDLNPDNSDVKLFIQLVQTYNQLFEENPINASGVDAKAIL-  
SARLSKSRLENLIAQLPGEKKNGLFGNLIASLGLTPNFK-  
SNFDLAEDAKLQLSKDQYDDDLNLLAQIGDQYADLFLAAKNLSDAILLSDILRVN-  
TEITKAPLSAMIKRYDEHHQDLTLLKALVRQQLPEKYKEIFFDQSKNGYAGYIDG-  
GASQEEFYKFIKPILEKMDGTEELLVKNLREDLLRKQRTFDNGSIPHQIHLGELHAIL-  
RRQEDFYPFKDNREKIEKILTRIPYYVGPLARGNSRFAWMTRKSEETIT-  
PWNFEVVDKGASAQSFIERMTNFDKNLPNEKVLPHSLLYEYFTVYNELT-  
KVKYVTEGMRKPAFLSGEQKKAIVDLLFKTNRKVTVKQLKEDYFKKIECFDSVEIS-  
GVEDRFNASLGTYHDLKIIKDKDFLDNEENEDILEDIVLTLTLFEDREMI-  
EERLKYAHLFDDKVMKQLKRRRYTGWGRLSRKLINGIRDKQSGKTILDFLKSDGFANRN-  
FMQLIHDDSLTFKEDIQKAQVSGQGDSLHEHIANLAGSPAIK-  
KGILQTVKVVDELVKVMGRHKPENIVIEMARENQTTQKGQKNSRERMKRIEE-  
GIKELGSQILKEHPVENTQLQNEKLYLYLQNGRDMYVDQELD-  
INRLSDYDVDHIVPQSFLKDDSIDNKVLRSDKNRGSNDVPSEEVVKKMKNY-  
WRQLLNAKLITQRKFDNLTKAERGGLSELDKAGFIKRQLVETRQITKHVAQILDSRM-  
NTKYDENDKLIREVKVITLKSCLVSDFRKDFQFYKVVREINNYHHAHDAYLNAVVGALIK-  
KYPKLESEFVYGDYKVDYRKMIAKSEQEIGKATAKYFFYSNIMNFFKTEITLANGEIRKR-  
PLIETNGETGEIVWDKGRDFATVRKVLSPQVNVKKTQVQGGF-  
SKESILPKRNSDKLIARKKDWDPKKGFFSPTVAYSVLVAKVEKGG-  
SKKLKSVKELLGITIMERSSEFEKNPIDFLEAKGYKEVKKDLIILPKYSLFELENGRKRMLA-  
SAGELQKGNELALPSKYVNFLYLASHYEKLG-  
SPEDNEQKQLFVEQHKHYLDEIIEQISEFSKRVLADANLDKVL SAYNKHRDKPIREQAE-  
NIIHLFTLTNLGAPAAFYFDTTIDRKQYRSTKEVLDATLIHQSTGLYETRIDLSQLGG-  
DSGGSPKKKRKV\*

**Supplementary Sequences 4.** Chemically modified crRNA and tracrRNA used in this study. The 2'-*O*-methyl 3'phosphorothioate (MS) modified bases are colored *red* and marked with \*.

Fah-E201-crRNA

U\*G\*G\*AAAUGGUGAGUUCUGUGGUUUUAGAGCUAUGCUGUUUUG

Pah-F263-crRNA

A\*G\*U\*GGAAGACUCGGAAGGCCGUUUUAGAGCUAUGCUGUUUUG

Fah-M1-crRNA

C\*A\*G\*CAUGUCCUUUAUCCAGGUUUUAGAGCUAUGCUGUUUUG

tracrRNA

ACAGCAUAGCAAGUUAAAAUAAGGCUAGUCCGUUAUCAACUUGAAAAAGUGGCAC-  
CGAGUCGGUGCU\*U\*U\*U
